# Supplementary material
Source: Springer Nature journal article supplement (https://www.springermedizin.de/resource/supplementary/12936_2013_2831_MOESM2_ESM.pdf/9544302)

■ Lowland ■ Middlebelt ■ Highland

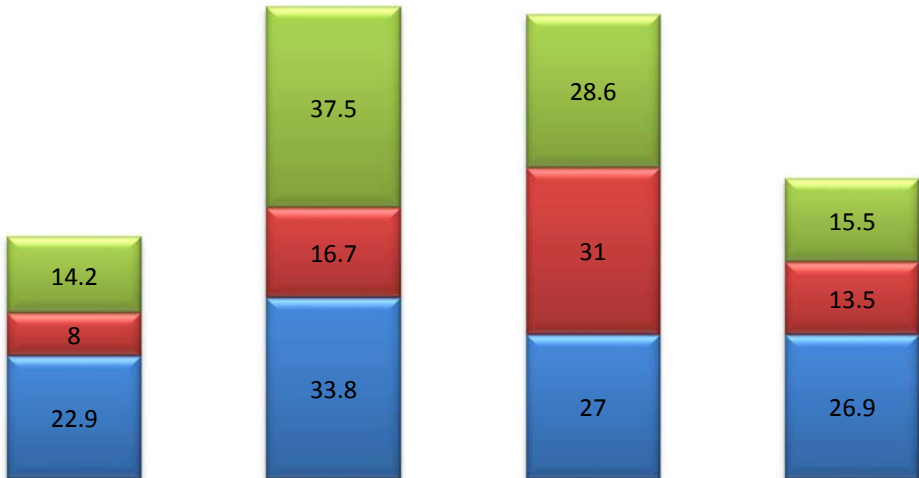

Negative

CM

AM

Total

Supplement: MOESM2 [file 9544302]
